# Supplementary material
Source: PubMed Central journal article supplement (PMC7212301)

Supplementary Figure 2 - Associations between all-cause mortality (Figure A) and hospitalisations (Figure C) by family income trajectories for single men and women, respectively, as well as sex differences in mortality (Figure B) and hospitalisations (Figure D) by family income among singles.

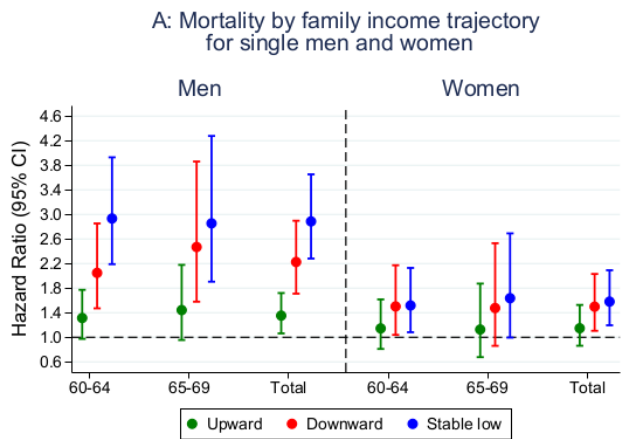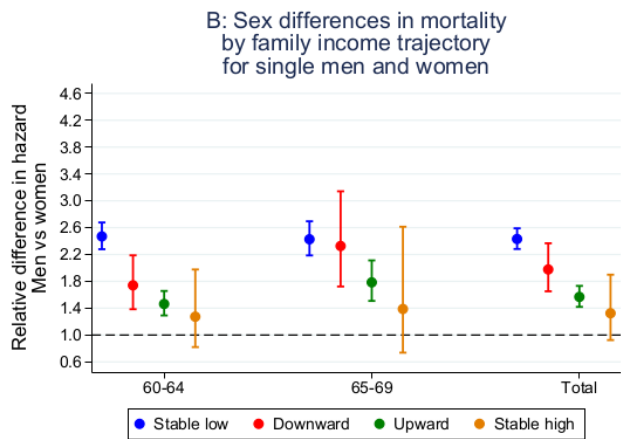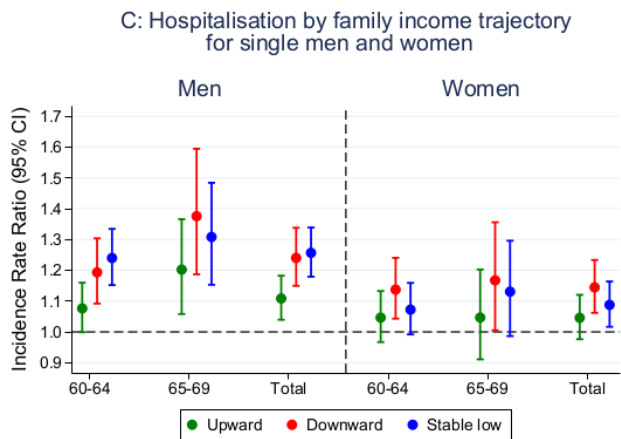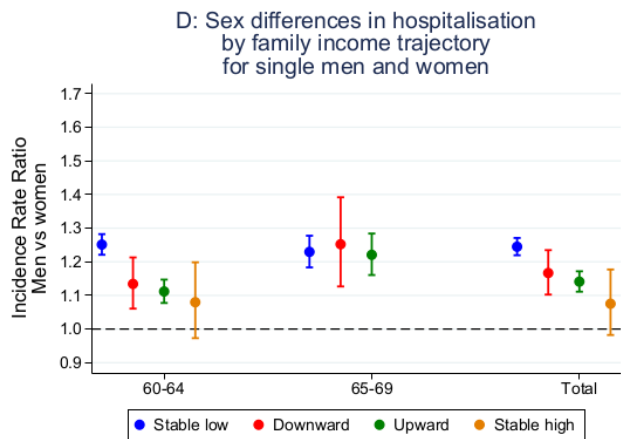

Supplement: NIHMS1584563-supplement-Suppl_Fig_2.pdf [file NIHMS1584563-supplement-Suppl_Fig_2.pdf]
