# Supplementary material
Source: PubMed Central journal article supplement (PMC7212301)
Supplement: NIHMS1584563-supplement-Suppl_tables.pdf [file NIHMS1584563-supplement-Suppl_tables.pdf]

**Supplementary Table 1 - Associations between all-cause mortality and hospitalisations by individual income, family income and partner's income trajectories for men and women, respectively**

|                          | Adjusted for birth cohorts |                  | Adjusted for birth cohorts and education |                  | Adjusted for birth cohorts and employment |                  |
|--------------------------|----------------------------|------------------|------------------------------------------|------------------|-------------------------------------------|------------------|
|                          | Men                        | Women            | Men                                      | Women            | Men                                       | Women            |
| Mortality                | HR (95% CI)                | HR (95% CI)      | HR (95% CI)                              | HR (95% CI)      | HR (95% CI)                               | HR (95% CI)      |
| <b>Individual income</b> |                            |                  |                                          |                  |                                           |                  |
| Stable high (ref)        | 1.00                       | 1.00             | 1.00                                     | 1.00             | 1.00                                      | 1.00             |
| Upward                   | 1.16 (1.13-1.18)           | 1.00 (0.97-1.03) | 1.10 (1.08-1.13)                         | 0.95 (0.92-0.97) | 1.15 (1.12-1.17)                          | 0.99 (0.96-1.02) |
| Downward                 | 1.79 (1.75-1.84)           | 1.29 (1.24-1.34) | 1.69 (1.65-1.74)                         | 1.20 (1.16-1.25) | 1.70 (1.66-1.75)                          | 1.26 (1.21-1.30) |
| Stable low               | 1.71 (1.67-1.75)           | 1.20 (1.16-1.23) | 1.56 (1.53-1.60)                         | 1.07 (1.04-1.11) | 1.63 (1.59-1.67)                          | 1.15 (1.11-1.18) |
| <b>Family income</b>     |                            |                  |                                          |                  |                                           |                  |
| Stable high (ref)        | 1.00                       | 1.00             | 1.00                                     | 1.00             | 1.00                                      | 1.00             |
| Upward                   | 1.19 (1.14-1.25)           | 1.10 (1.03-1.16) | 1.16 (1.11-1.22)                         | 1.05 (0.99-1.12) | 1.17 (1.11-1.23)                          | 1.08 (1.01-1.15) |
| Downward                 | 1.87 (1.77-1.97)           | 1.38 (1.30-1.47) | 1.77 (1.67-1.87)                         | 1.29 (1.21-1.37) | 1.83 (1.74-1.94)                          | 1.35 (1.27-1.44) |
| Stable low               | 1.85 (1.76-1.95)           | 1.56 (1.46-1.66) | 1.71 (1.62-1.80)                         | 1.39 (1.30-1.49) | 1.77 (1.68-1.86)                          | 1.49 (1.40-1.59) |
| <b>Partner's income</b>  |                            |                  |                                          |                  |                                           |                  |
| Stable high (ref)        | 1.00                       | 1.00             | 1.00                                     | 1.00             | 1.00                                      | 1.00             |
| Upward                   | 0.96 (0.94-0.99)           | 1.03 (0.99-1.07) | 0.95 (0.92-0.97)                         | 1.01 (0.97-1.04) | 0.96 (0.94-0.99)                          | 1.04 (1.00-1.08) |
| Downward                 | 1.03 (0.99-1.08)           | 1.21 (1.15-1.27) | 1.01 (0.97-1.06)                         | 1.17 (1.11-1.24) | 1.03 (0.99-1.08)                          | 1.21 (1.15-1.27) |
| Stable low               | 0.97 (0.94-1.00)           | 1.13 (1.08-1.18) | 0.94 (0.91-0.97)                         | 1.07 (1.02-1.11) | 0.97 (0.94-1.00)                          | 1.13 (1.08-1.18) |
| Hospitalisation          | IRR (95% CI)               | IRR (95% CI)     | IRR (95% CI)                             | IRR (95% CI)     | IRR (95% CI)                              | IRR (95% CI)     |
| <b>Individual income</b> |                            |                  |                                          |                  |                                           |                  |
| Stable high (ref)        | 1.00                       | 1.00             | 1.00                                     | 1.00             | 1.00                                      | 1.00             |
| Upward                   | 1.06 (1.05-1.07)           | 1.00 (0.99-1.01) | 1.04 (1.03-1.05)                         | 0.98 (0.97-0.99) | 1.06 (1.05-1.06)                          | 0.99 (0.98-1.00) |
| Downward                 | 1.24 (1.22-1.25)           | 1.09 (1.07-1.10) | 1.21 (1.20-1.22)                         | 1.06 (1.05-1.08) | 1.22 (1.21-1.23)                          | 1.08 (1.06-1.09) |
| Stable low               | 1.18 (1.17-1.19)           | 1.01 (1.00-1.02) | 1.14 (1.14-1.15)                         | 0.97 (0.97-0.98) | 1.17 (1.16-1.18)                          | 0.98 (1.00-0.99) |
| <b>Family income</b>     |                            |                  |                                          |                  |                                           |                  |
| Stable high              | 1.00                       | 1.00             | 1.00                                     | 1.00             | 1.00                                      | 1.00             |
| Upward                   | 1.05 (1.04-1.06)           | 1.03 (1.01-1.04) | 1.04 (1.02-1.05)                         | 1.02 (1.00-1.03) | 1.04 (1.03-1.06)                          | 1.02 (1.01-1.04) |
| Downward                 | 1.19 (1.17-1.21)           | 1.13 (1.11-1.15) | 1.16 (1.14-1.18)                         | 1.11 (1.10-1.13) | 1.18 (1.16-1.20)                          | 1.12 (1.11-1.14) |
| Stable low               | 1.21 (1.19-1.23)           | 1.12 (1.11-1.14) | 1.17 (1.15-1.29)                         | 1.10 (1.08-1.12) | 1.19 (1.18-1.21)                          | 1.11 (1.09-1.13) |
| <b>Partner's income</b>  |                            |                  |                                          |                  |                                           |                  |
| Stable high              | 1.00                       | 1.00             | 1.00                                     | 1.00             | 1.00                                      | 1.00             |
| Upward                   | 1.00 (0.99-1.01)           | 1.03 (1.02-1.04) | 1.00 (0.99-1.01)                         | 0.96 (0.95-0.97) | 1.00 (0.99-1.01)                          | 1.03 (1.02-1.04) |
| Downward                 | 1.01 (1.00-1.02)           | 1.10 (1.08-1.11) | 0.91 (0.90-0.92)                         | 0.90 (0.89-0.91) | 1.01 (1.00-1.02)                          | 1.10 (1.08-1.11) |
| Stable low               | 0.97 (0.96-0.98)           | 1.10 (1.09-1.11) | 0.99 (0.97-1.02)                         | 1.01 (0.98-1.05) | 0.97 (0.96-0.98)                          | 1.10 (1.08-1.11) |

HR = hazard ratio, IRR = incidence rate ratio, CI = confidence interval

Supplementary Table 2 – Sex differences in all-cause mortality and hospitalisations by individual and family income trajectories

|                   | Adjusted for birth cohorts             | Adjusted for birth cohorts and education | Adjusted for birth cohorts and employment |
|-------------------|----------------------------------------|------------------------------------------|-------------------------------------------|
| Mortality         | Relative difference in hazard (95% CI) | Relative difference in hazard (95% CI)   | Relative difference in hazard (95% CI)    |
| Individual income |                                        |                                          |                                           |
| Stable high       | 1.37 (1.33-1.41)                       | 1.39 (1.35-1.43)                         | 1.37 (1.33-1.41)                          |
| Upward            | 1.59 (1.56-1.62)                       | 1.62 (1.58-1.65)                         | 1.62 (1.59-1.65)                          |
| Downward          | 1.91 (1.85-1.98)                       | 1.94 (1.88-2.02)                         | 1.91 (1.85-1.98)                          |
| Stable low        | 1.93 (1.89-1.98)                       | 1.96 (1.91-2.00)                         | 1.99 (1.94-2.03)                          |
| Family income     |                                        |                                          |                                           |
| Stable high       | 1.39 (1.31-1.47)                       | 1.41 (1.33-1.49)                         | 1.40 (1.32-1.49)                          |
| Upward            | 1.52 (1.44-1.60)                       | 1.55 (1.48-1.62)                         | 1.55 (1.47-1.63)                          |
| Downward          | 1.89 (1.78-2.00)                       | 1.92 (1.81-2.03)                         | 1.93 (1.82-2.05)                          |
| Stable low        | 1.66 (1.56-1.76)                       | 1.71 (1.61-1.81)                         | 1.71 (1.61-1.82)                          |
| Hospitalisation   | IRR (95% CIs)                          | IRR (95% CIs)                            | IRR (95% CIs)                             |
| Individual income |                                        |                                          |                                           |
| Stable high       | 1.11 (1.10-1.12)                       | 1.11 (1.11-1.12)                         | 1.11 (1.10-1.12)                          |
| Upward            | 1.19 (1.18-1.20)                       | 1.19 (1.19-1.20)                         | 1.20 (1.19-1.20)                          |
| Downward          | 1.27 (1.25-1.28)                       | 1.27 (1.26-1.29)                         | 1.27 (1.25-1.28)                          |
| Stable low        | 1.32 (1.31-1.33)                       | 1.32 (1.31-1.33)                         | 1.31 (1.30-1.32)                          |
| Family income     |                                        |                                          |                                           |
| Stable high       | 1.16 (1.14-1.17)                       | 1.16 (1.14-1.18)                         | 1.16 (1.14-1.17)                          |
| Upward            | 1.18 (1.17-1.20)                       | 1.19 (1.18-1.21)                         | 1.19 (1.17-1.20)                          |
| Downward          | 1.22 (1.20-1.24)                       | 1.22 (1.20-1.24)                         | 1.23 (1.21-1.25)                          |
| Stable low        | 1.25 (1.23-1.27)                       | 1.25 (1.23-1.28)                         | 1.26 (1.24-1.28)                          |

IRR = incidence rate ratio, CI = confidence interval
