# Supplementary material
Source: PubMed Central journal article supplement (PMC7212301)

## Supplementary Figure 1 - Flow chart of the study population

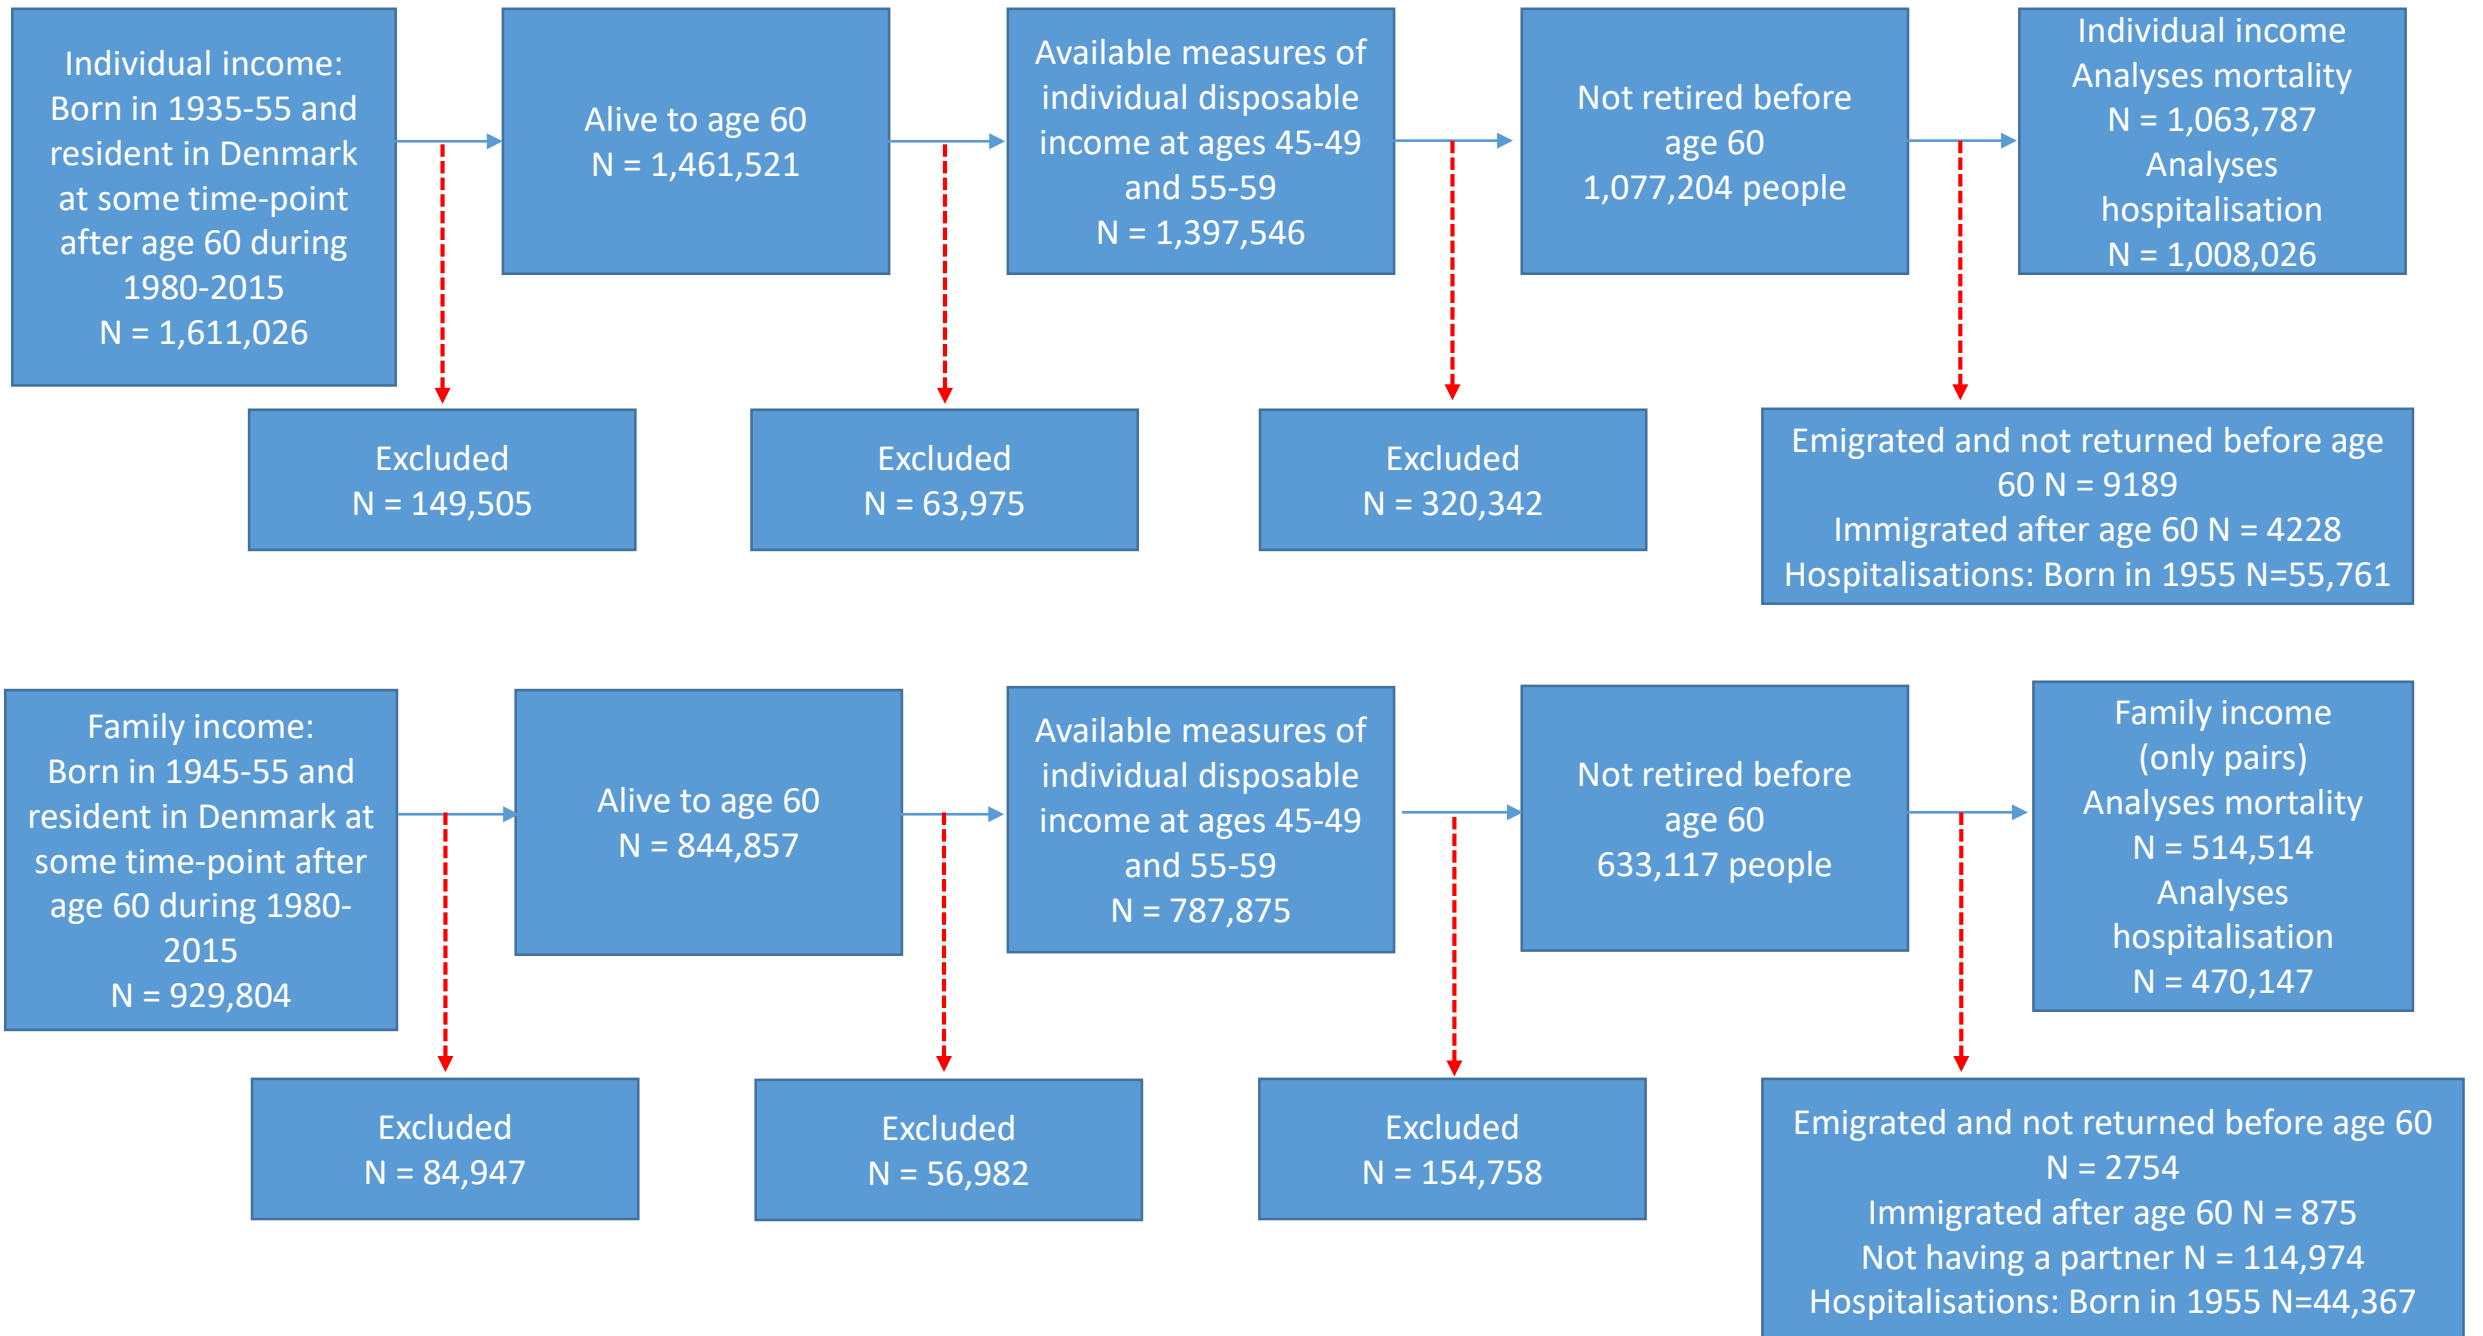

Supplement: NIHMS1584563-supplement-Suppl_Fig__1.pdf [file NIHMS1584563-supplement-Suppl_Fig__1.pdf]
